# Supplementary material for: Solvent-induced structural regulation over Ni2P/CNT hybrids towards boosting the performance of supercapacitors
Source: Royal Society of Chemistry journal article supplement (doi:10.1039/d3dt00517h), 2023-01-01
Supplement: d3dt00517h1.pdf [file d3dt00517h1.pdf]

# **Solvent-induced structural regulation over Ni<sub>2</sub>P/CNTs hybrids towards the boosting performance for supercapacitors**

Xiuli Zhang,<sup>a</sup> Guancheng Xu,<sup>a</sup> Li Zhang<sup>\*a,b</sup>

a. State Key Laboratory of Chemistry and Utilization of Carbon Based Energy Resources; College of Chemistry, Xinjiang University, Urumqi, 830017, Xinjiang, PR China.

b. College of Chemical Engineering, Xinjiang University, Urumqi, 830017, Xinjiang, PR China.

\* Corresponding author. Email: zhangli420@xju.edu.cn

## Chemical Reagents

Anhydrous ethanol ( $\text{CH}_3\text{CH}_2\text{OH}$ , 99.7 wt%), methanol, formic acid ( $\text{HCOOH}$ , 88 wt%), and methylamine water solution ( $\text{CH}_3\text{NH}_2$ , 40 wt%) were purchased from Zhiyuan Chemical Plants (Tianjin). Nickel (II) nitrate hexahydrate ( $\text{Ni}(\text{NO}_3)_2 \cdot 6\text{H}_2\text{O}$ , 98%), and sodium hypophosphite ( $\text{NaH}_2\text{PO}_2 \cdot \text{H}_2\text{O}$ , 99%) was purchased from Yong sheng Fine Chemical Company (Tianjin). Surfactant polyvinylpyrrolidone K30 (PVP K30) was purchased from Tokyo Chemical Industry Co., Ltd. The commercial active carbon (AC YP-80F) was purchased from KURARAY (Japan). Of note, all the chemicals were of analytical grade and used without further purification.

## Structural characterizations

The surface structure and elemental composition of samples were examined by field-emission scanning electron microscopy (FESEM; Hitachi S-4800 microscope) attached with energy dispersive X-ray spectrometry (EDX). Powder X-ray diffraction (PXRD) tested by Bruker D8 advance diffractometer with Cu K $\alpha$  radiation and high-resolution transmission electron microscopy (HRTEM; Hitachi H600 microscope) were used to analyze crystal phase and porous features of products. Surface element state was measured using X-ray photoelectron spectroscopy (XPS) performed on Escalab 250 Xi system.

## Electrochemical measurements

A CHI760E working station was applied to carry out the electrochemical technologies including cyclic voltammetry (CV) with a ranging potential from 0 to 0.6 V for the three-electrode system and 0 to 1.6 V for the asymmetric supercapacitor, respectively, galvanostatic charge-discharge (GCD) and electrochemical impedance spectroscopy (EIS, 10 to 100000 Hz) tests. All electrochemical performances were measured in 6 M KOH electrolyte. At first, a standard three-

electrode configuration was designed to access to partial performance information, where a saturated Hg/HgO electrode (in 1 M KOH) and platinum electrode were used as the reference electrode and counter electrode, respectively. The synthesized products were employed as the working electrodes, which were prepared by coating a homogenous slurry containing the 2.25 mg prepared samples, 0.25 mg carbon black and polytetrafluoroethylene (PTFE, 5 wt%) onto a nickel foam ( $1 \times 1 \text{ cm}^2$ ), together with a mass ratio of 9:1:1. Then, the nickel foam was dried at a vacuum oven before pressed under 10 MPa. Moreover, an asymmetric supercapacitor (ASC) was also assembled by using 3D flower-like  $\text{Ni}_2\text{P}/\text{CNTs}$  hybrid as positive electrode and commercial active carbon (YP-80F) as negative electrode, where the mass of the positive and negative electrodes is 2.25 and 5.82 mg, respectively. The mass loading of the two electrodes satisfies the following charge balance equation [1-3]:

$$m_+ / m_- = c_- \Delta V_- / c_+ \Delta V_+ \quad (1)$$

Where  $m_+$  and  $m_-$  represent the mass loadings of the anode and cathode, respectively.  $c_+$  and  $c_-$  are the corresponding specific capacitance (F /g).  $\Delta V_+$ ,  $\Delta V_-$  refer to Voltage window (V) of positive and negative electrodes, respectively.  $C_+$  or  $C_-$  can be evaluated from the galvanostatic discharge process based on the following relation:

$$C = I\Delta t / m\Delta V \quad (2)$$

In which  $m$  (g) is the mass of the active materials,  $I$  (A),  $\Delta t$  (s), and  $\Delta V$  (V) represent galvanostatic discharge current, time and potential window of the three-electrode system. For ASC device, the specific capacitance ( $C_m$ ) also can be calculated with the same principle but  $M$  (g) refers to the total mass of two active materials as follows (3):

$$C_m = I\Delta t / M\Delta V \quad (3)$$

The energy density ( $E$ , Wh /Kg) and power density ( $P$ , W/ Kg) of ASC device can be determined

according to the equations (4) and (5):

$$E = C_m \Delta V^2 / 2 \times 3.6 \quad (4)$$

$$P = 3600E / \Delta t \quad (5)$$

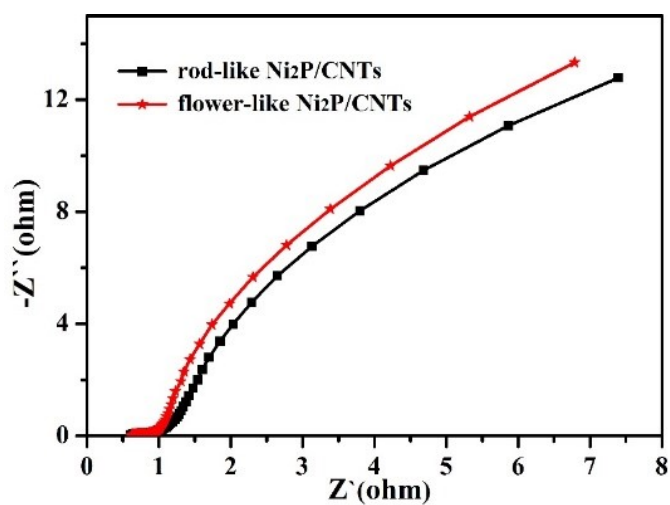

Fig. S1. Nyquist plots of the prepared samples.

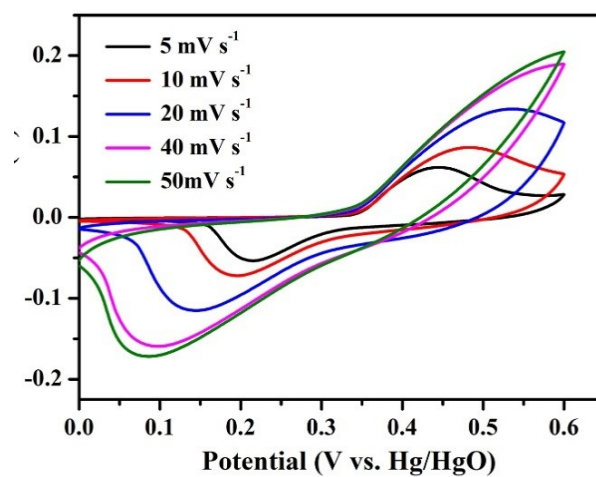

Fig. S2. CV curves of 3D flower-like Ni<sub>2</sub>P/CNTs hybrid at different scan rates.

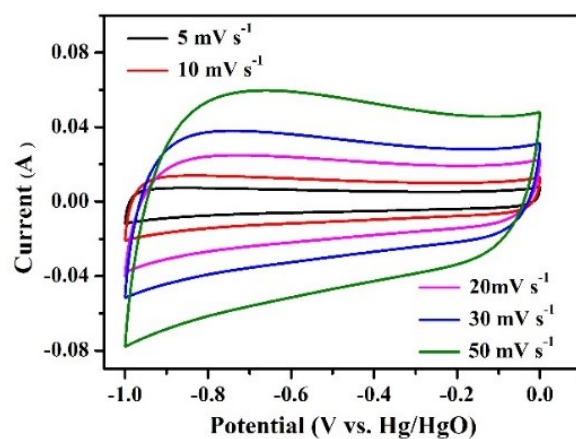

Fig. S3. CV curves of AC(YP-80F) at different scan rates.

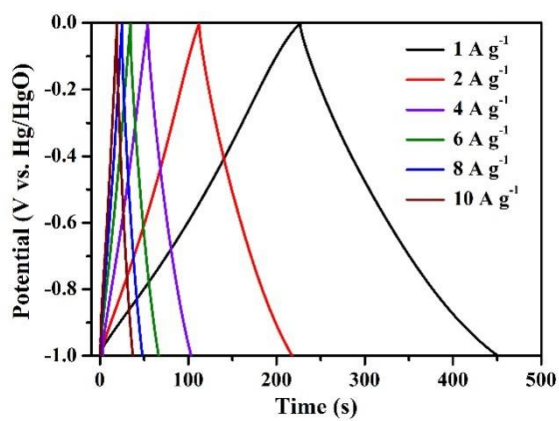

Fig. S4. GCD curves of AC(YP-80F) at different current densities.

## References

- [1] Q. Wang, J. Su, H. Chen, D. Wang, X. Tian, Y. Zhang, X. Feng, S. Wang, J. Li, H. Jin, Highly conductive nitrogen-doped  $sp^2/sp^3$  hybrid carbon as a conductor-free charge storage host, *Adv. Funct. Mater.*, 2022, **32**, 2209201.
- [2] X. Jiao, J. Wang, Z. Yuan, C. Zhang, Smart current collector for high-energy-density and high-contrast electrochromic supercapacitors toward intelligent and wearable power application, *Energy Storage Mater.*, 2023, **54**, 254-265.
- [3] R. Patil, N. Kumar, S. Bhattacharjee, H. Wu, P. Han, B. Matsagar, C. Wu, R. Salunkhe, A. Bhaumik, S. Dutta, Influence of catalase encapsulation on Cobalt@Nanoporous carbon with multiwall shell for supercapacitor and polyurethane synthesis using carbon dioxide, *Chem. Eng. J.*, 2023, **453**, 139874.
